# Supplementary material for: Mechanical computing
Source: Springer Nature journal article supplement (doi:10.1038/s41586-021-03623-y), 2021-10-06
Supplement: 41586_2021_3623_MOESM1_ESM.pdf [file 41586_2021_3623_MOESM1_ESM.pdf]

## Supplementary information

---

# Mechanical computing

---

In the format provided by the  
authors and unedited

## Supplementary Discussion: “ $n$ -ary Abstractions”

In this Perspective, especially Section II, we have discussed the abstraction of binary information based on the static/dynamic response of a mechanical computing unit. Although binary representations have been widely used in both conventional and unconventional computers, mechanical computing systems can also offer  $n$ -ary abstractions ( $n > 2$ ) of information, which may enhance the efficiency of information storage. For example, a mechanical unit with tristable behavior (i.e., there exists three stable configurations) can represent discrete values of {‘0’, ‘1’, ‘2’} or {‘-1’, ‘0’, ‘+1’} (see also Ref.[S1] for a ternary calculating machine designed in 1840).

To examine the efficiency, we explore a case study in which we express a positive integer  $k$  by using various  $n$ -digit systems (see Fig. S1a for the change of the required number of digits for different  $n$ -ary digit systems). Here, we define the efficiency ( $f$ ) as  $f = an + \log_n k$  where  $a$  is a weight coefficient, and we plot this efficiency as a function of  $n$ . If  $k = 10^5$  is selected, the minimum efficiency can be obtained by choosing other  $n$ -ary systems, instead of binary storage (see Fig. S1b). By extending this calculation to different  $k$  values, we find that to express smaller  $k$  values (e.g.,  $10^3$ ),  $n = 3, 4$  can be advantageous, compared with binary or decimal digits as shown in Fig. S1c (see also Ref. [S2] for a discussion of why “ternary digit” can be optimal for storage efficiency compared with binary digit (bit) systems). Recently, multistable mechanical structures have been reported, e.g., tristable rotating squares Ref. [S3] and quadstable origami Ref. [S4] (see Fig. S1d-e), and such multistable elements have potential for developing  $n = 3, 4$  digit information storage.

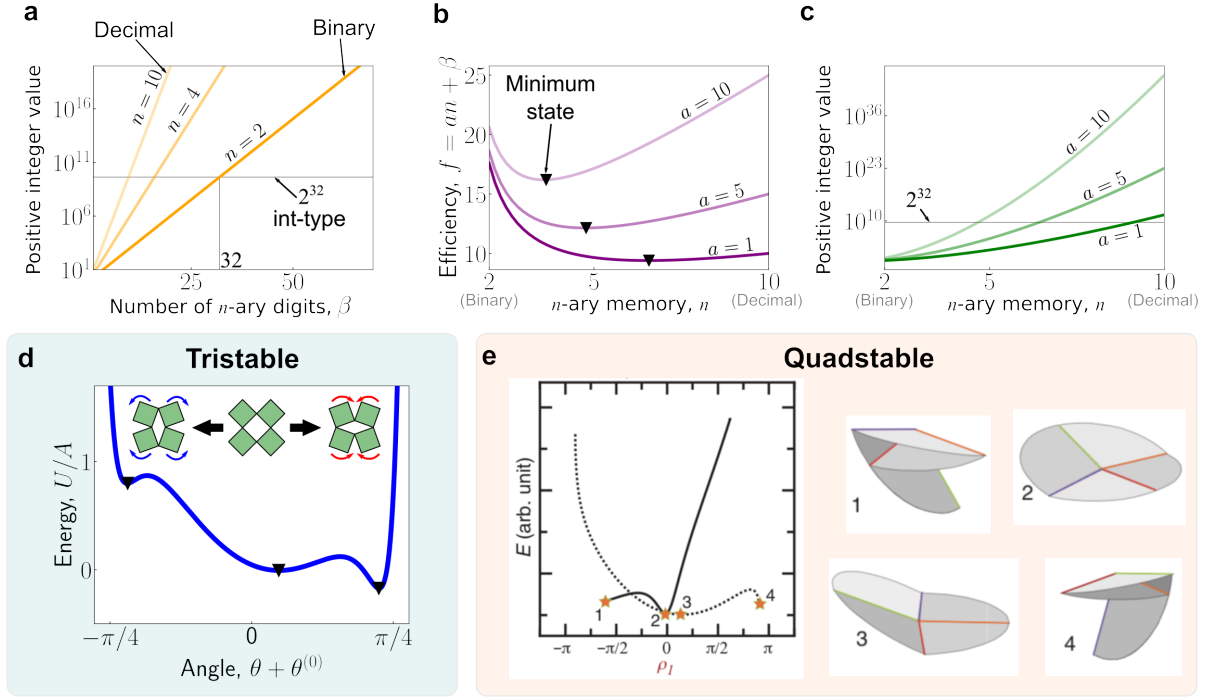

FIG. S1. Analysis of Information Storage in Systems with Non-binary Abstractions (a) The number ( $\beta$ ) of  $n$ -ary digits required to express a positive integer ( $k$ ) can be calculated as  $\beta = \log_n k$ . The grey horizontal line indicates  $2^{32}$ , which corresponds to the maximum value of a 4-byte integer representation. (b) To express a large integer number efficiently, we assume that the efficiency of information storage is proportional to  $n$  and define the efficiency ( $f$ ) as  $f = an + \log_n k$  where  $a$  is a weight coefficient. We consider the case of  $k = 10^5$ , and plot the result for  $a = 1, 5$ , and  $10$ . The black triangle markers represent the local minimum state, which means the most efficient storage, i.e., smaller  $n$  and smaller number of digits. (c) We calculate and plot various positive integer numbers as a function of the efficient  $n$ -ary storage. Based on this calculation, to express smaller numbers (e.g.,  $10^3$ ),  $n = 3, 4$  can be advantageous, compare to binary or decimal digits. Please note that this calculation is a rough estimation without considering fabrication challenges, operation speed, or robustness. Example multistable mechanical structures include (d) ternary memory based on rotating squares (reprinted with permission from Reference [S3], © 2020 American Physical Society) and (e) quaternary memory based on origami (reproduced with permission from Reference [S4], © 2015 American Physical Society). See also Ref. [S2] for a discussion of why base  $n = 3$  (i.e., ternary digit) can be optimal for storage efficiency.

## References:

- [S1] Glusker, M., Hogan, D. M. & Vass, P. The ternary calculating machine of thomas fowler. *IEEE Annals of the History of Computing* **27**, 4 (2005).
- [S2] Hayes, B. Computing science: third base. *American Scientist* **89**, 490 (2001).
- [S3] Yasuda, H., Korpas, L. M. & Raney, J. R. Transition waves and formation of domain walls in multistable mechanical metamaterials. *Physical Review Applied* **13**, 054067 (2020).
- [S4] Waitukaitis, S. , Menaut, R., Chen, B. G.-g. & van Hecke, M. Origami multistability: from single vertices to metasheets. *Physical Review Letters* **114**, 055503 (2015).
